# Supplementary material
Source: MDPI journal article supplement (https://www.mdpi.com/1999-4907/14/2/431)
Supplement: s1 [file s1]

# Supplementary Materials:

**Table S1** Stand characteristics of the experimental sites.

| Site    | Stand density (tree·hm <sup>-2</sup> ) | Mixed | Slope (°) | Aspect    |
|---------|----------------------------------------|-------|-----------|-----------|
| PM      | 750                                    |       | 19        | Northwest |
| PM + BS | 733                                    | 7:3   | 23        | Northwest |
| PM + MC | 708                                    | 7:3   | 26        | Northwest |
| PM + CJ | 710                                    | 7:3   | 15        | East      |
| PM + CO | 775                                    | 7:3   | 18        | Southwest |
| PM + MM | 750                                    | 7:3   | 27        | Southwest |

Notes: *Pinus massoniana* (PM), *Bretschneidera sinensis* (BS), *Manglietia chingii* (MC), *Cercidiphyllum japonicum* (CJ), *Camellia oleifera* (CO), and *Michelia maudiae* (MM).

**Table S2.** Effects of forest type on litter thickness and stock.

| Stand type | Litter thickness (cm) |              | Litter stock (t·hm <sup>-2</sup> ) |              |
|------------|-----------------------|--------------|------------------------------------|--------------|
|            | OL                    | OF           | OL                                 | OF           |
| PM         | 2.16 ± 0.24b          | 0.68 ± 0.18b | 11.59 ± 2.57a                      | 3.13 ± 0.75b |
| PM + BS    | 2.72 ± 0.24a          | 1.33 ± 0.18a | 8.84 ± 1.14a                       | 4.15 ± 0.62a |
| PM + MC    | 2.33 ± 0.39ab         | 1.27 ± 0.14a | 9.44 ± 0.71a                       | 5.16 ± 0.63a |
| PM + CJ    | 1.68 ± 0.15b          | 1.24 ± 0.17a | 6.37 ± 1.16b                       | 4.52 ± 0.61a |
| PM + CO    | 2.23 ± 0.51ab         | 1.63 ± 0.31a | 6.31 ± 1.41b                       | 3.85 ± 0.51a |
| PM + MM    | 3.14 ± 0.53a          | 1.61 ± 0.17a | 6.51 ± 1.11b                       | 3.54 ± 0.54a |

Note: *Pinus massoniana* (PM), *Bretschneidera sinensis* (BS), *Manglietia chingii* (MC), *Cercidiphyllum japonicum* (CJ), *Camellia oleifera* (CO), and *Michelia maudiae* (MM). OF: semi-decomposed litter; OL: undecomposed litter. Different lowercase letters indicate significant differences among different forest types ( $P < 0.05$ ).

**Table S3.** Effects of forest type on soil properties.

| Soil depth (cm) | Stand type | SBD (g·cm <sup>-3</sup> ) | CP (%)         | NCP (%)       | TP (%)         | MWD (mm)      | GMD (mm)       | D              | SOC (g·kg <sup>-1</sup> ) |
|-----------------|------------|---------------------------|----------------|---------------|----------------|---------------|----------------|----------------|---------------------------|
| 0–20            | PM         | 1.36 ± 0.04ab             | 44.98 ± 1.44cd | 5.55 ± 0.63ab | 50.53 ± 1.68cd | 3.01 ± 0.25b  | 1.42 ± 0.30bc  | 2.73 ± 0.05a   | 18.80 ± 0.82c             |
|                 | PM + BS    | 1.23 ± 0.03bc             | 49.57 ± 2.29bc | 4.47 ± 0.53b  | 54.04 ± 2.22bc | 2.10 ± 0.33c  | 0.78 ± 0.22c   | 2.80 ± 0.04a   | 22.72 ± 1.39c             |
|                 | PM + MC    | 1.27 ± 0.03abc            | 49.34 ± 0.76bc | 6.08 ± 0.75ab | 55.08 ± 1.10bc | 2.18 ± 0.16c  | 0.89 ± 0.08c   | 2.74 ± 0.01a   | 19.34 ± 0.49c             |
|                 | PM + CJ    | 1.40 ± 0.05a              | 42.70 ± 1.91d  | 4.49 ± 0.54b  | 47.19 ± 1.91d  | 3.51 ± 0.32ab | 2.17 ± 0.48ab  | 2.58 ± 0.06b   | 27.48 ± 3.70bc            |
|                 | PM + CO    | 1.26 ± 0.04abc            | 53.14 ± 1.01ab | 5.02 ± 0.33ab | 58.16 ± 1.10ab | 3.69 ± 0.28ab | 2.49 ± 0.42a   | 2.51 ± 0.05b   | 36.46 ± 5.85b             |
|                 | PM + MM    | 1.15 ± 0.07c              | 55.19 ± 1.62a  | 7.42 ± 1.44a  | 62.61 ± 1.80a  | 3.87 ± 0.06a  | 2.98 ± 0.08a   | 2.27 ± 0.01c   | 40.89 ± 5.84a             |
| 20–40           | PM         | 1.53 ± 0.02a              | 39.94 ± 1.35c  | 3.23 ± 0.37b  | 43.17 ± 1.16cd | 3.17 ± 0.30a  | 1.59 ± 0.35bc  | 2.71 ± 0.06ab  | 13.98 ± 1.40b             |
|                 | PM + BS    | 1.38 ± 0.05bc             | 45.04 ± 1.92b  | 2.92 ± 0.36b  | 47.96 ± 1.94bc | 2.21 ± 0.36b  | 0.84 ± 0.21c   | 2.80 ± 0.04a   | 15.22 ± 0.85b             |
|                 | PM + MC    | 1.51 ± 0.05ab             | 40.42 ± 1.57c  | 3.18 ± 0.55b  | 43.93 ± 1.82cd | 3.11 ± 0.47a  | 1.74 ± 0.45bc  | 2.64 ± 0.06abc | 9.88 ± 1.02b              |
|                 | PM + CJ    | 1.58 ± 0.03a              | 39.33 ± 0.85c  | 2.75 ± 0.37b  | 42.08 ± 0.86d  | 3.89 ± 0.21a  | 2.74 ± 0.36a   | 2.49 ± 0.07c   | 13.40 ± 2.68b             |
|                 | PM + CO    | 1.32 ± 0.05c              | 47.79 ± 1.46ab | 3.58 ± 0.51b  | 51.37 ± 1.53b  | 3.36 ± 0.14a  | 1.91 ± 0.78ab  | 2.61 ± 0.02bc  | 19.28 ± 3.21ab            |
|                 | PM + MM    | 1.29 ± 0.06c              | 51.51 ± 1.13a  | 5.69 ± 1.26a  | 57.19 ± 1.99a  | 3.78 ± 0.12a  | 2.84 ± 0.15a   | 2.32 ± 0.01d   | 30.82 ± 10.57a            |
| 40–60           | PM         | 1.55 ± 0.43ab             | 39.52 ± 1.50c  | 3.33 ± 0.47b  | 42.84 ± 1.30c  | 3.54 ± 0.33a  | 2.19 ± 0.44abc | 2.59 ± 0.06ab  | 12.83 ± 1.66b             |

|        |         |               |                 |               |                |              |               |               |                |
|--------|---------|---------------|-----------------|---------------|----------------|--------------|---------------|---------------|----------------|
| 60–80  | PM + BS | 1.54 ± 0.05ab | 36.30 ± 2.17c   | 3.25 ± 0.46b  | 39.55 ± 1.97c  | 2.95 ± 0.19a | 1.37 ± 0.16c  | 2.72 ± 0.01a  | 13.19 ± 0.75b  |
|        | PM + MC | 1.54 ± 0.04ab | 38.90 ± 1.02c   | 3.18 ± 0.47b  | 42.08 ± 1.17c  | 3.00 ± 0.34a | 1.59 ± 0.36c  | 2.65 ± 0.07ab | 8.55 ± 1.67b   |
|        | PM + CJ | 1.60 ± 0.03a  | 37.72 ± 1.15c   | 2.75 ± 0.24b  | 40.47 ± 1.28c  | 3.96 ± 0.21a | 2.88 ± 0.32ab | 2.46 ± 0.04bc | 10.28 ± 2.42b  |
|        | PM + CO | 1.43 ± 0.04b  | 44.61 ± 0.91b   | 3.22 ± 0.36b  | 47.84 ± 0.96b  | 3.17 ± 0.56a | 1.87 ± 0.65bc | 2.63 ± 0.11ab | 13.04 ± 4.83b  |
|        | PM + MM | 1.27 ± 0.07c  | 48.89 ± 1.16a   | 4.81 ± 0.64a  | 53.71 ± 1.35a  | 4.03 ± 0.06a | 3.22 ± 0.11a  | 2.27 ± 0.04c  | 28.76 ± 9.69a  |
|        | PM      | 1.57 ± 0.03ab | 41.81 ± 1.64bc  | 2.90 ± 0.34ab | 44.71 ± 1.58b  | 3.38 ± 0.58a | 2.07 ± 0.67b  | 2.63 ± 0.10a  | 12.32 ± 3.36ab |
|        | PM + BS | 1.67 ± 0.02a  | 34.26 ± 0.76d   | 2.38 ± 0.27b  | 36.64 ± 0.65c  | 3.73 ± 0.03a | 2.25 ± 0.06b  | 2.63 ± 0.02a  | 9.61 ± 0.47b   |
|        | PM + MC | 1.60 ± 0.05ab | 38.15 ± 1.61cd  | 2.01 ± 0.32b  | 40.16 ± 1.87c  | 3.39 ± 0.22a | 1.86 ± 0.30b  | 2.66 ± 0.04a  | 9.04 ± 0.76b   |
|        | PM + CJ | 1.56 ± 0.03ab | 36.99 ± 1.12d   | 2.59 ± 0.29b  | 39.58 ± 1.18c  | 2.81 ± 0.25a | 2.53 ± 0.42ab | 2.54 ± 0.08a  | 8.08 ± 0.49b   |
|        | PM + CO | 1.46 ± 0.05bc | 42.32 ± 0.85b   | 2.91 ± 0.34ab | 45.23 ± 0.88b  | 3.77 ± 0.17a | 2.52 ± 0.28ab | 2.53 ± 0.05a  | 8.84 ± 4.13b   |
| 80–100 | PM + MM | 1.37 ± 0.06b  | 46.38 ± 1.56a   | 3.95 ± 0.80a  | 50.33 ± 1.86a  | 4.32 ± 0.07a | 3.67 ± 0.17a  | 2.19 ± 0.07b  | 20.43 ± 5.62a  |
|        | PM      | 1.59 ± 0.04a  | 42.42 ± 2.32ab  | 2.69 ± 0.32ab | 45.10 ± 2.11ab | 3.67 ± 0.11a | 2.27 ± 0.23a  | 2.59 ± 0.07a  | 10.74 ± 2.95a  |
|        | PM + BS | 1.66 ± 0.03a  | 36.71 ± 0.97c   | 2.57 ± 0.25ab | 39.29 ± 1.09c  | 3.61 ± 0.11a | 2.24 ± 0.18a  | 2.58 ± 0.03a  | 9.59 ± 0.82a   |
|        | PM + MC | 1.55 ± 0.03ab | 38.14 ± 0.99bc  | 2.25 ± 0.37b  | 40.39 ± 1.05c  | 3.56 ± 0.17a | 2.19 ± 0.30a  | 2.57 ± 0.06a  | 8.22 ± 1.34a   |
|        | PM + CJ | 1.55 ± 0.03ab | 36.07 ± 1.62c   | 2.45 ± 0.36ab | 38.52 ± 1.56c  | 3.80 ± 0.21a | 2.60 ± 0.34a  | 2.51 ± 0.05a  | 7.86 ± 2.73a   |
|        | PM + CO | 1.43 ± 0.06bc | 39.67 ± 1.00abc | 2.38 ± 0.13ab | 42.05 ± 0.97bc | 3.98 ± 0.34a | 2.87 ± 0.63a  | 2.49 ± 0.11a  | 10.30 ± 3.95a  |
|        | PM + MM | 1.35 ± 0.07c  | 43.29 ± 1.31a   | 3.31 ± 0.35a  | 46.60 ± 1.28a  | 3.79 ± 0.23a | 2.83 ± 0.45a  | 2.32 ± 0.14a  | 16.01 ± 3.64a  |

Note: *Pinus massoniana* (PM), *Bretschneidera sinensis* (BS), *Manglietia chingii* (MC), *Cercidiphyllum japonicum* (CJ), *Camellia oleifera* (CO), and *Michelia maudiae* (MM). SBD: soil bulk density, CP: capillary porosity, NCP: noncapillary porosity, TP: total porosity, MWD: mean weight diameter, GWD: geometric mean diameter, D: mass fractal dimension, and SOC: soil organic carbon. Different lowercase letters in the same soil layer indicate significant differences among different forest types ( $P < 0.05$ ).
